# Supplementary material
Source: PubMed Central journal article supplement (PMC3458426)

# Tricolor Emission of a Fluorescent Heteroditopic Ligand over a Concentration Gradient of Zinc(II) Ions

## Supporting Information

*Kesavapillai Sreenath, Ronald J. Clark, and Lei Zhu\**

Department of Chemistry and Biochemistry  
Florida State University, 95 Chieftan Way  
Tallahassee, Florida 32306-4390

[lzhu@chem.fsu.edu](mailto:lzhu@chem.fsu.edu)

## Table of Contents

| No.      | Title                                                                                                                                                                                                                                                                              | Page No.     |
|----------|------------------------------------------------------------------------------------------------------------------------------------------------------------------------------------------------------------------------------------------------------------------------------------|--------------|
| <b>I</b> | <b>Additional Figures</b>                                                                                                                                                                                                                                                          | <b>S4-S8</b> |
|          | <b>Figure S1.</b> Visual appearance of <b>2</b> (10 $\mu\text{M}$ ) in $\text{CH}_3\text{CN}$ upon increasing $\text{Zn}(\text{ClO}_4)_2$ concentration from 1 nM to 1 M under ambient light, and upon illumination using a handheld UV lamp.                                      | <b>S4</b>    |
|          | <b>Figure S2.</b> Absorbance increase ( $A/A_0$ at 568 nm) of <b>2</b> (10 $\mu\text{M}$ ), with increasing $[\text{Zn}(\text{ClO}_4)_2]$ and fitting curve of $A/A_0$ vs $[\text{Zn}^{2+}]$ based on a 1:1 binding isotherm equation.                                             | <b>S4</b>    |
|          | <b>Figure S3.</b> IR spectra of <b>3</b> (blue) and $[\text{Zn}(\mathbf{3})](\text{ClO}_4)_2$ .                                                                                                                                                                                    | <b>S5</b>    |
|          | <b>Figure S4.</b> Effect of addition of $\text{Zn}(\text{ClO}_4)_2$ (0-60 $\mu\text{M}$ ) on absorption spectrum of the mixture of <b>1</b> (3.0 $\mu\text{M}$ ) and <b>2</b> (3.0 $\mu\text{M}$ ) in $\text{CH}_3\text{CN}$ , and corresponding changes of the emission spectrum. | <b>S5</b>    |
|          | <b>Figure S5.</b> Effect of addition of $\text{Pb}(\text{ClO}_4)_2$ (0-32 $\mu\text{M}$ ) on the absorption spectrum of compound <b>4</b> (3.1 $\mu\text{M}$ ) in $\text{CH}_3\text{CN}$ , and corresponding changes of the emission spectrum.                                     | <b>S6</b>    |
|          | <b>Figure S6.</b> Effect of addition of $\text{Fe}(\text{ClO}_4)_2$ (0-32 $\mu\text{M}$ ) on the absorption spectrum of compound <b>4</b> (3.1 $\mu\text{M}$ ) in $\text{CH}_3\text{CN}$ , and corresponding changes of the emission spectrum.                                     | <b>S6</b>    |
|          | <b>Figure S7.</b> Variation of fluorescence intensity of <b>2</b> at 588 nm vs. pH, and the fitting curve based on a modified Henderson–Hasselbalch equation.                                                                                                                      | <b>S7</b>    |
|          | <b>Figure S8.</b> Visual appearance of <b>5</b> (10 $\mu\text{M}$ ) in $\text{CH}_3\text{CN}$ upon increasing $\text{Zn}(\text{ClO}_4)_2$ concentration from 1 nM to 0.1 M under ambient light, and upon illumination using a handheld UV lamp.                                    | <b>S7</b>    |
|          | <b>Figure S9.</b> Absorbance increase ( $A/A_0$ at 584 nm) of <b>5</b> (10 $\mu\text{M}$ ) with increasing $[\text{Zn}(\text{ClO}_4)_2]$ , and the fitting curve of $A/A_0$ vs $[\text{Zn}^{2+}]$ based on                                                                         | <b>S8</b>    |

a 1:1 binding isotherm equation.

**Figure S10.** Variation of fluorescence intensity of **5** at 610 nm vs. pH. **S8**

**Figure S11.** Fluorescence decay profiles of **5** and **6** in the presence of  $\text{Zn}(\text{ClO}_4)_2$  monitored in  $\text{CH}_3\text{CN}$ . **S9**

**Figure S12.** Cyclic voltammograms. **S9**

**Figure S13.** Effect of addition of  $\text{ZnCl}_2$  (0-98  $\mu\text{M}$ ) on the absorption and emission spectra of compound **6** (5  $\mu\text{M}$ ) in a 1:1  $\text{CH}_3\text{CN}$ /HEPES buffer (50 mM HEPES, 50 mM NaCl, pH 7.2) solution. **S10**

**Table S1.** Electrochemical data. **S10**

**II** **References** **S10**

**III** **Copies of  $^1\text{H}$  and  $^{13}\text{C}$  NMR Spectra** **S11-S22**

$^1\text{H}$  and  $^{13}\text{C}$  NMR of 2-amino-6[(trimethylsilyl)ethynyl]pyridine **S11**

$^1\text{H}$  and  $^{13}\text{C}$  NMR of 2-amino-6-ethynylpyridine **S12**

$^1\text{H}$  and  $^{13}\text{C}$  NMR of compound **7** **S13**

$^1\text{H}$  and  $^{13}\text{C}$  NMR of compound **2** **S14**

$^1\text{H}$  and  $^{13}\text{C}$  NMR of compound **3** **S15**

$^1\text{H}$  and  $^{13}\text{C}$  NMR of compound **8** **S16**

$^1\text{H}$  and  $^{13}\text{C}$  NMR of compound **10** **S17**

$^1\text{H}$  and  $^{13}\text{C}$  NMR of compound **11** **S18**

$^1\text{H}$  and  $^{13}\text{C}$  NMR of compound **4** **S19**

$^1\text{H}$  and  $^{13}\text{C}$  NMR of compound **12** **S20**

$^1\text{H}$  and  $^{13}\text{C}$  NMR of compound **5** **S21**

$^1\text{H}$  and  $^{13}\text{C}$  NMR of compound **6** **S22**

## I. Additional Figures

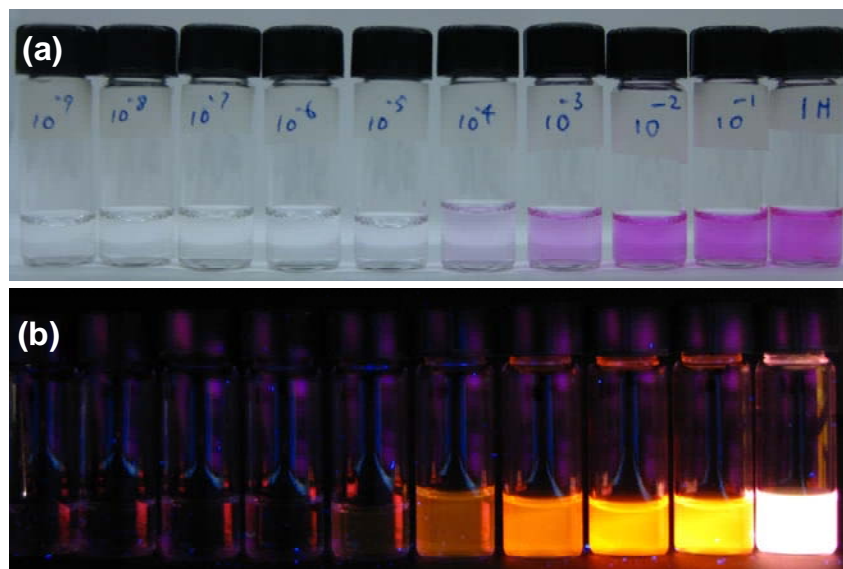

**Figure S1.** Visual appearance of **2** (10  $\mu$ M) in  $CH_3CN$  upon increasing  $Zn(ClO_4)_2$  concentration from 1 nM to 1 M (left to right) under (a) ambient light, and (b) upon illumination using a handheld UV lamp ( $\lambda_{ex} = 365$  nm).

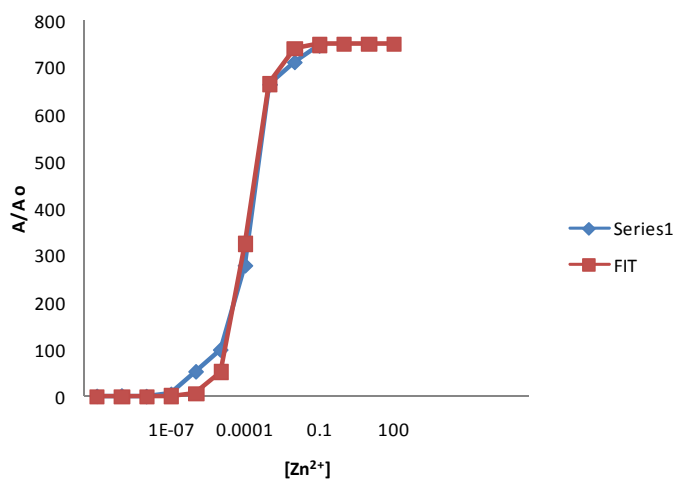

**Figure S2.** Absorbance increase ( $A/A_0$  at 568 nm) of **2** (10  $\mu$ M), with increasing  $[Zn(ClO_4)_2]$ . The brown line is the fitting curve of  $A/A_0$  vs  $[Zn^{2+}]$  based on a 1:1 binding isotherm equation.<sup>1</sup> Dissociation constant of the putative 1:1 (ligand/ $Zn^{2+}$ ) complex  $K_d = 0.1$  mM.

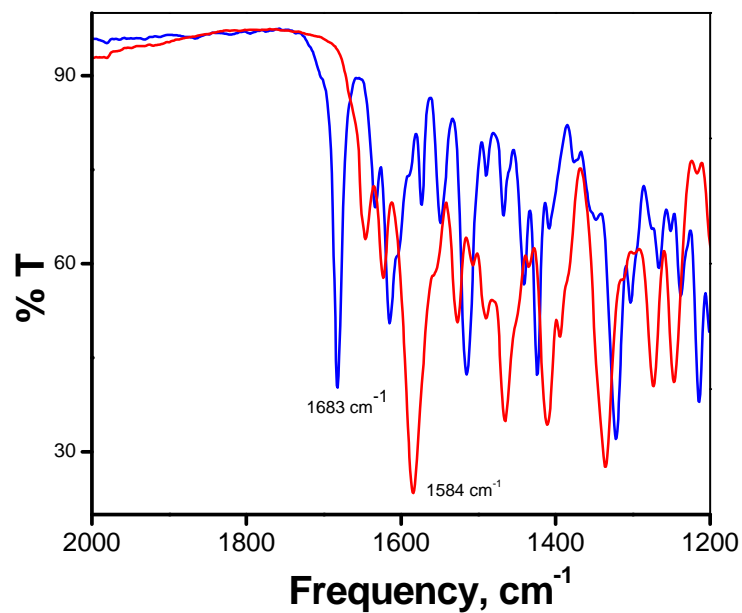

**Figure S3.** IR spectra of **3** (blue) and  $[\text{Zn}(\mathbf{3})](\text{ClO}_4)_2$ .

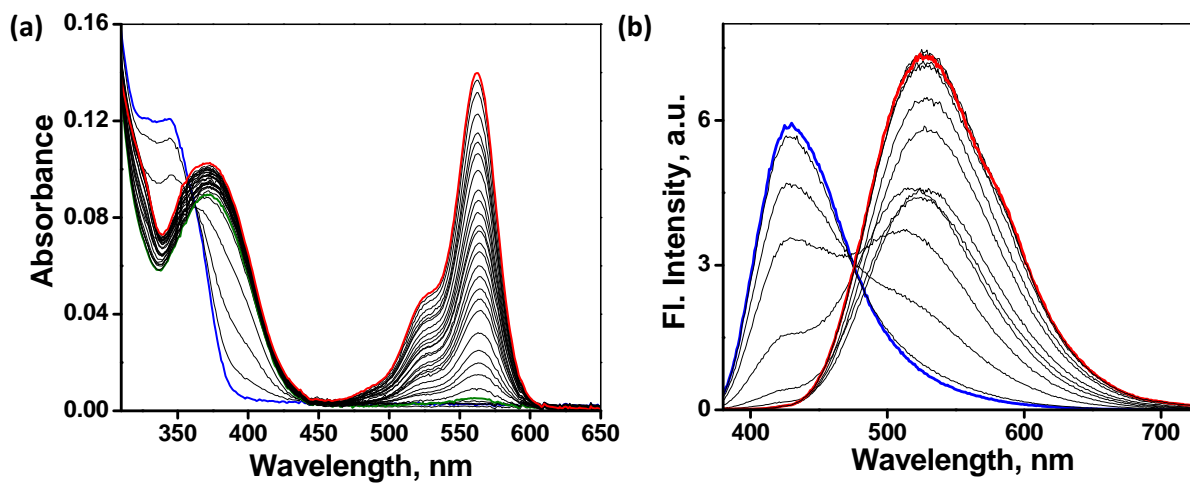

**Figure S4.** (a) Effect of addition of  $\text{Zn}(\text{ClO}_4)_2$  (0-60  $\mu\text{M}$ ) on the absorption spectrum of the mixture of **1** (3.0  $\mu\text{M}$ ) and **2** (3.0  $\mu\text{M}$ ) in  $\text{CH}_3\text{CN}$ . (b) Corresponding changes of the emission spectrum ( $\lambda_{\text{ex}} = 370 \text{ nm}$ ).

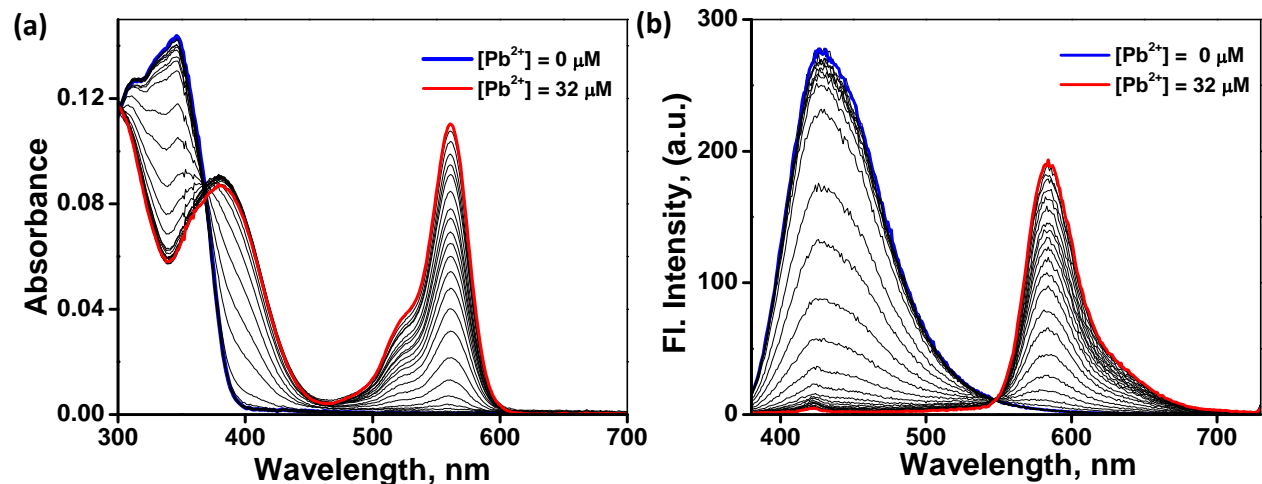

**Figure S5.** (a) Effect of addition of  $\text{Pb}(\text{ClO}_4)_2$  (0-32  $\mu\text{M}$ ) on the absorption spectrum of compound **4** (3.1  $\mu\text{M}$ ) in  $\text{CH}_3\text{CN}$ . (b) Corresponding changes of the emission spectrum ( $\lambda_{\text{ex}} = 370$  nm).

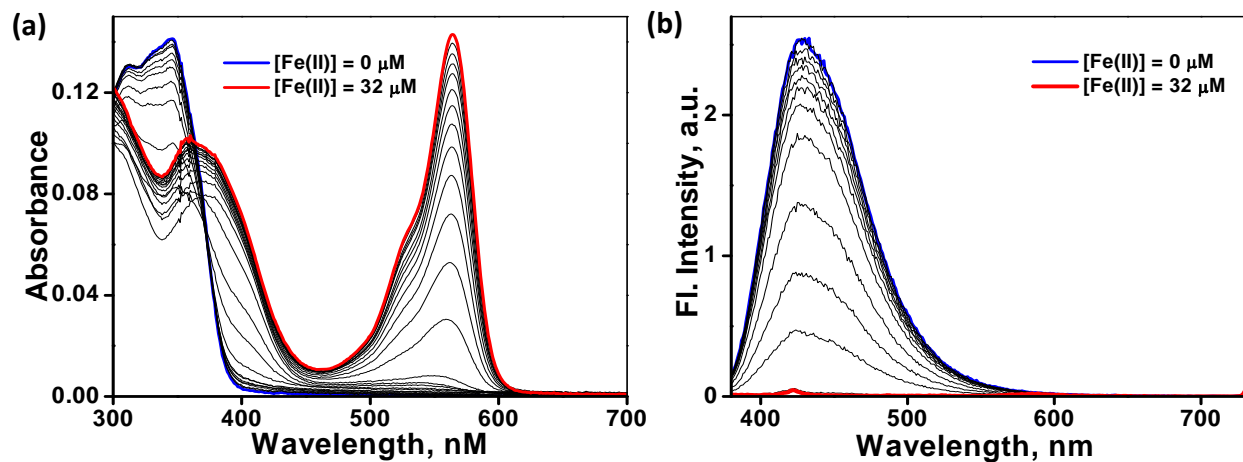

**Figure S6.** (a) Effect of addition of  $\text{Fe}(\text{ClO}_4)_2$  (0-32  $\mu\text{M}$ ) on the absorption spectrum of compound **4** (3.1  $\mu\text{M}$ ) in  $\text{CH}_3\text{CN}$ . (b) Corresponding changes of the emission spectrum ( $\lambda_{\text{ex}} = 370$  nm).

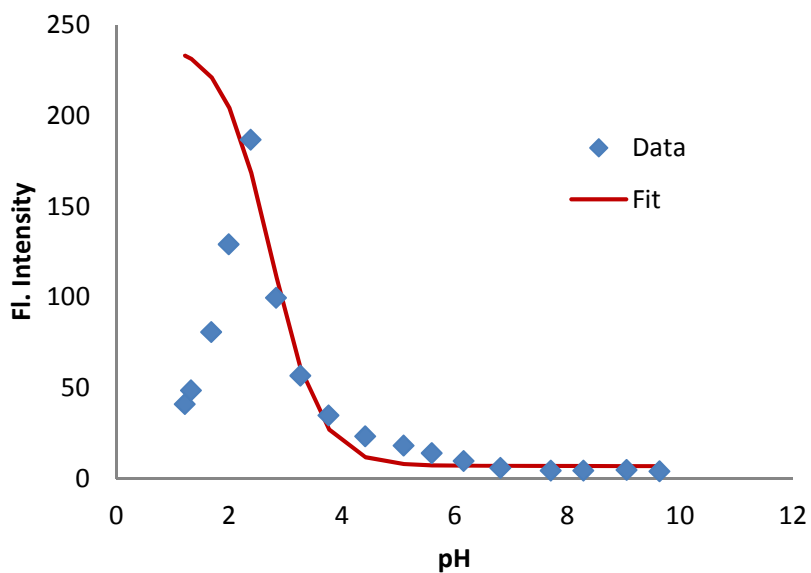

**Figure S7.** Variation of fluorescence intensity of **2** at 588 nm vs. pH ( $\lambda_{\text{ex}} = 570$  nm). The purple line is the fitting curve based on a modified Henderson–Hasselbalch equation.<sup>2</sup>  $\text{pK}_{\text{a}} \sim 2.8$ .

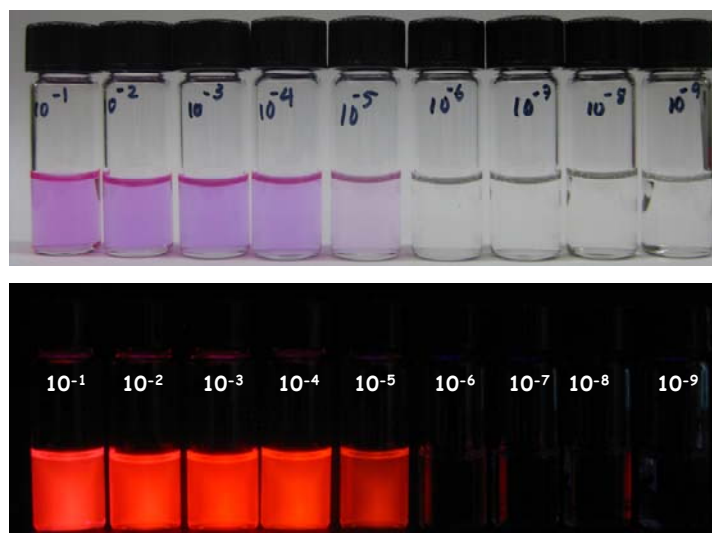

**Figure S8.** Visual appearance of **5** ( $10 \mu\text{M}$ ) in  $\text{CH}_3\text{CN}$  upon increasing  $\text{Zn}(\text{ClO}_4)_2$  concentration from 1 nM to 0.1 M (right to left) under (a) ambient light, and (b) upon illumination using a handheld UV lamp ( $\lambda_{\text{ex}} = 365$  nm).

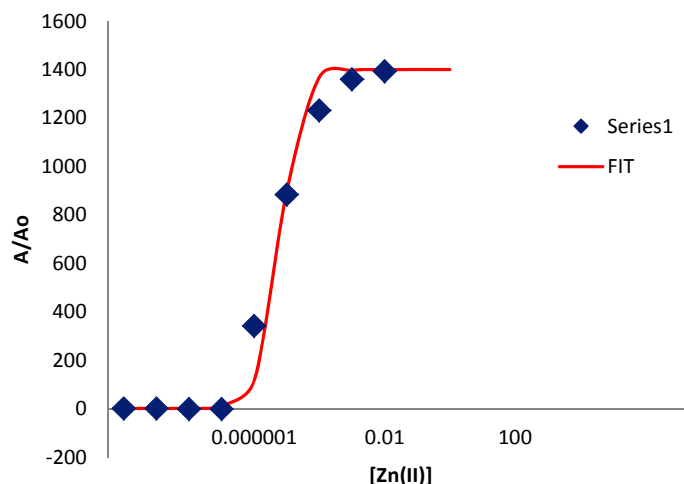

**Figure S9.** Absorbance increase ( $A/A_0$  at 584 nm) of **5** (10  $\mu\text{M}$ ) with increasing  $[\text{Zn}(\text{ClO}_4)_2]$ . The red line is the fitting curve of  $A/A_0$  vs  $[\text{Zn}^{2+}]$  based on a 1:1 binding isotherm equation.<sup>1</sup> Dissociation constant of the putative 1:1 complex (ligand/ $\text{Zn}^{2+}$ )  $K_d = 20 \mu\text{M}$ .

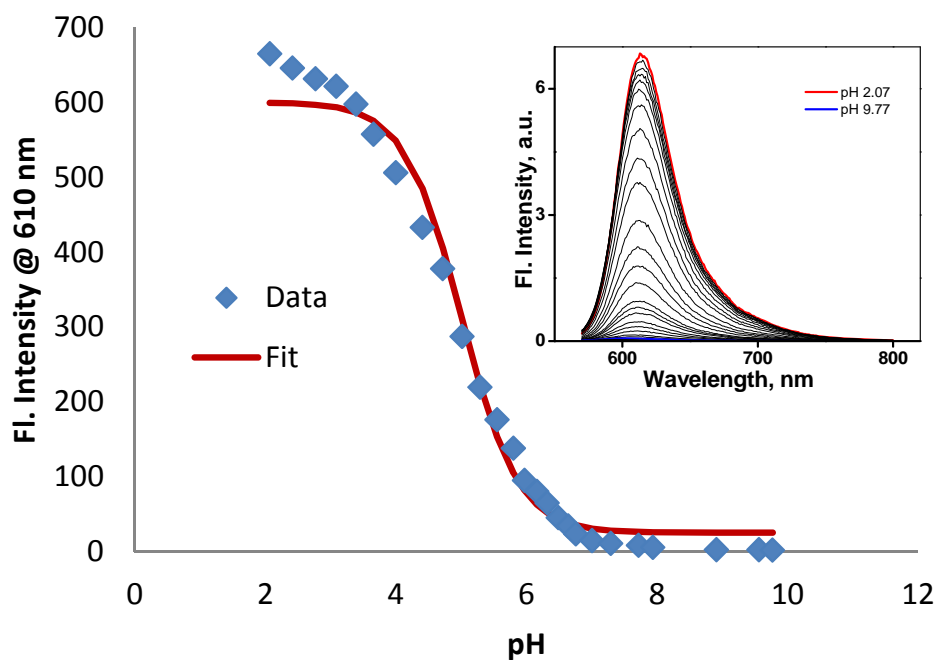

**Figure S10.** Variation of fluorescence intensity of **5** at 610 nm vs. pH ( $\lambda_{\text{ex}} = 570 \text{ nm}$ ). Inset shows the emission spectra of **5** at various pH (red line at pH = 2.07 and blue line at pH = 9.77).  $\text{p}K_a = 5.0$ .



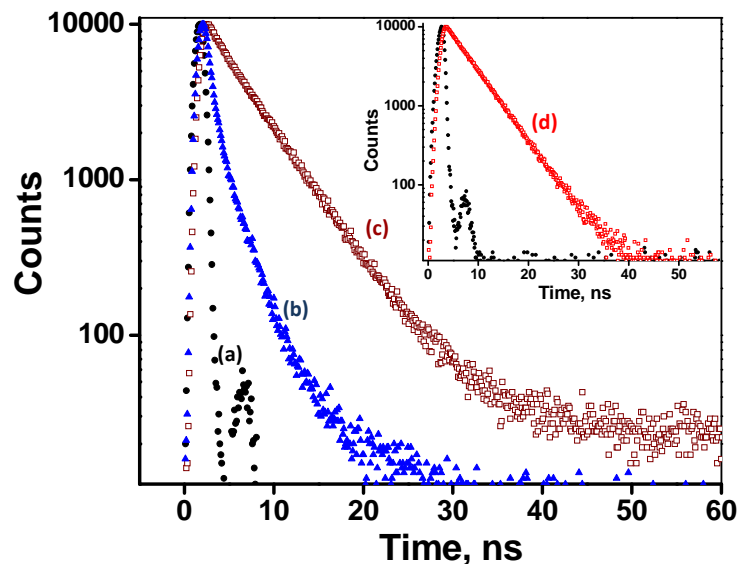

**Figure S11.** Fluorescence decay profiles monitored at 520 nm ( $\blacktriangle$ ) and 610 nm ( $\square$ ) by exciting samples using a 370 nm nanoLED excitation source, (a) IRF ( $\bullet$ ), (b) the monozinc complex of **6** ( $\blacktriangle$ , blue), (c) **6** in the presence of 10 equiv of  $\text{Zn}(\text{ClO}_4)_2$  ( $\square$ , wine). Inset: (d) **5** in the presence of 10 equiv of  $\text{Zn}(\text{ClO}_4)_2$  ( $\square$ , red) in  $\text{CH}_3\text{CN}$  excited at 560 nm.

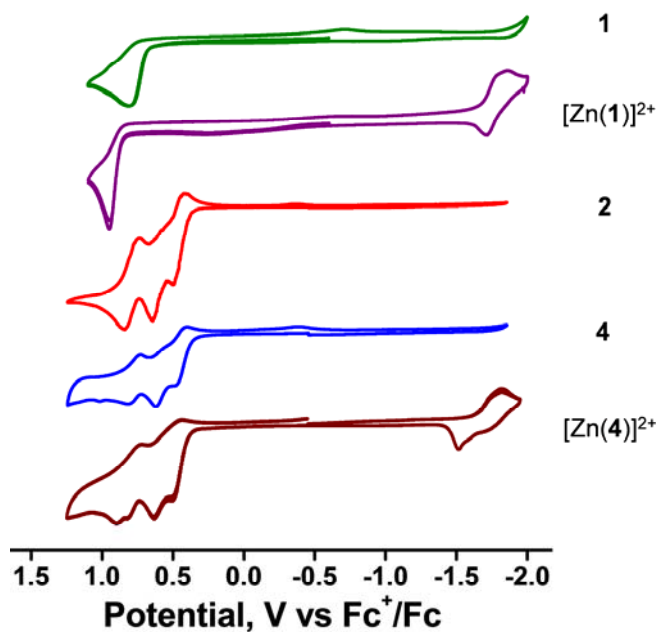

**Figure S12.** Cyclic voltammograms of **1** (green),  $[\text{Zn}(\mathbf{1})]^{2+}$  (violet), **2** (red), **4** (blue), and  $[\text{Zn}(\mathbf{4})]^{2+}$  (brown) in 0.1 M  $\text{Bu}_4\text{NPF}_6/\text{CH}_3\text{CN}$  at a sweep rate of 100 mV/s.

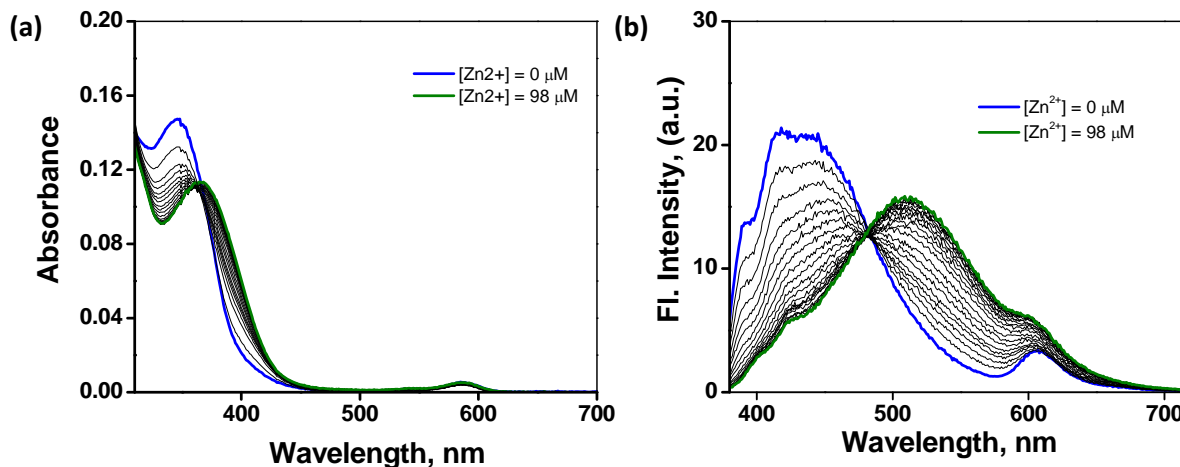

**Figure S13.** (a) Effect of addition of  $\text{ZnCl}_2$  (0-98  $\mu\text{M}$ ) on the absorption spectrum of compound **6** (5  $\mu\text{M}$ ) in a 1:1  $\text{CH}_3\text{CN}/\text{HEPES}$  buffer (50 mM HEPES, 50 mM NaCl, pH 7.2) solution. (b) Corresponding changes of the emission spectrum ( $\lambda_{\text{ex}} = 370$  nm).

**Table S1.** Electrochemical data of **1**,  $[\text{Zn}(\mathbf{1})]^{2+}$ , **2**, **4**, and  $[\text{Zn}(\mathbf{4})]^{2+}$ .

| Compound                                    | <sup>a</sup> $E_{\text{ox}}$ , V vs $\text{Fc}^+/\text{Fc}$ | $E_{\text{red}}$ , V vs $\text{Fc}^+/\text{Fc}$ |
|---------------------------------------------|-------------------------------------------------------------|-------------------------------------------------|
| <b>1</b>                                    | 0.80                                                        | -                                               |
| <sup>b</sup> $[\text{Zn}(\mathbf{1})]^{2+}$ | 0.96                                                        | -1.73                                           |
| <b>2</b>                                    | 0.47                                                        | -                                               |
| <b>4</b>                                    | 0.47                                                        | -                                               |
| <sup>b</sup> $[\text{Zn}(\mathbf{4})]^{2+}$ | 0.48                                                        | -1.77                                           |

<sup>a</sup> Lowest oxidation potential, <sup>b</sup> of monozinc complex.

## II. References

- (1) Zhu, L.; Zhong, Z.; Anslyn, E. V. *J. Am. Chem. Soc.* **2005**, *127*, 4260-4269.
- (2) Kuang, G.-C.; Allen, J. R.; Baird, M. A.; Nguyen, B. T.; Zhang, L.; Morgan, T. J. Jr.; Levenson, C. W.; Davidson, M. W.; Zhu, L. *Inorg. Chem.* **2011**, *50*, 10493-10504.

### III. Copies of $^1\text{H}$ and $^{13}\text{C}$ NMR of Compounds

$^1\text{H}$  NMR (300 MHz,  $\text{CDCl}_3$ ) of 2-amino-6[(trimethylsilyl)ethynyl]pyridine

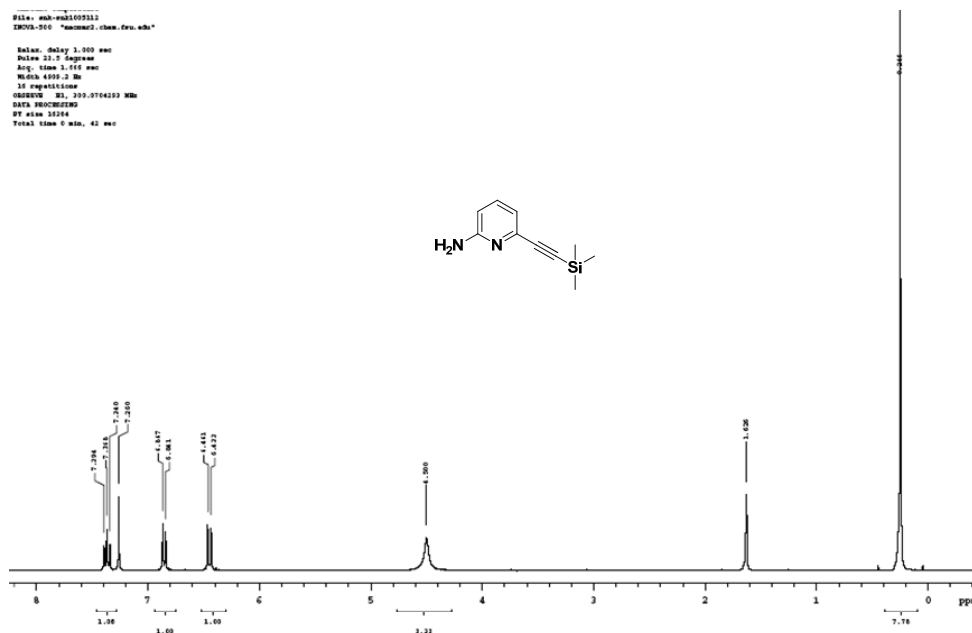

$^{13}\text{C}$  NMR (125 MHz,  $\text{CDCl}_3$ ) of 2-amino-6[(trimethylsilyl)ethynyl]pyridine

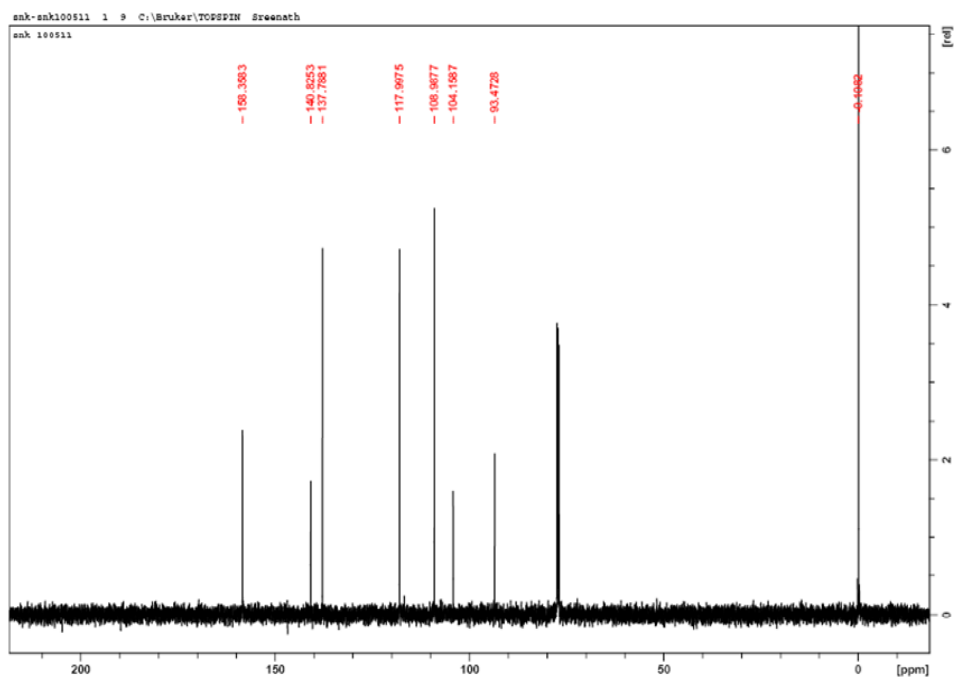

# $^1\text{H}$ NMR (300 MHz, $\text{CDCl}_3$ ) of 2-amino-6-ethynylpyridine

```
300 MHz   May 10 2011
Automation directory:
pc1magr_00133
File: pc1magr_00133.apul
Solvent: cdcl3
Acquisition temperature
File: snk-0011005115
INOVA-500 "nucmer2.chem.fsu.edu"

Delay: 1.000 sec
Pulse: 23.5 degree
Acq. time: 3.161 sec
NUC1: 13C 125.0 MHz
15 repetitions
OBSERVED: 83, 300.0704200 MHz
DATA PROCESSING
PT: 1000 1024
Total time 0 min, 41 sec
```

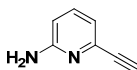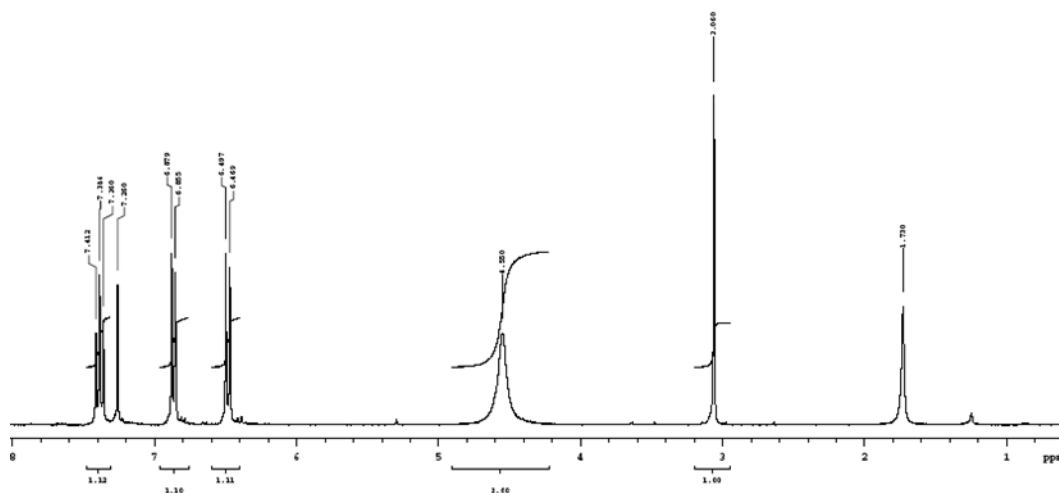

# $^{13}\text{C}$ NMR (125 MHz, $\text{CDCl}_3$ ) of 2-amino-6-ethynylpyridine

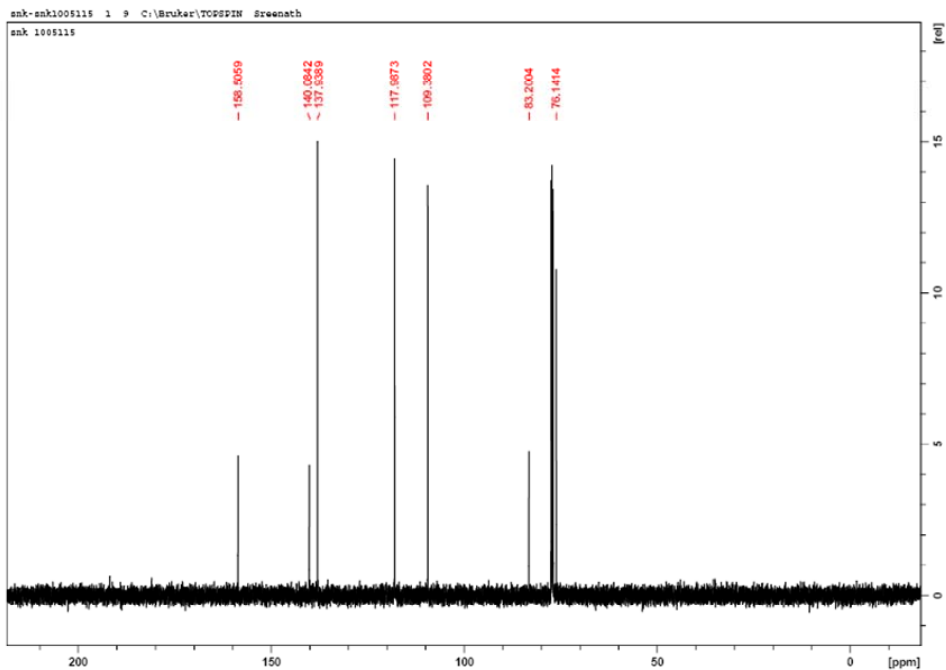

<sup>1</sup>H NMR (300 MHz, CDCl<sub>3</sub>) of compound **7**

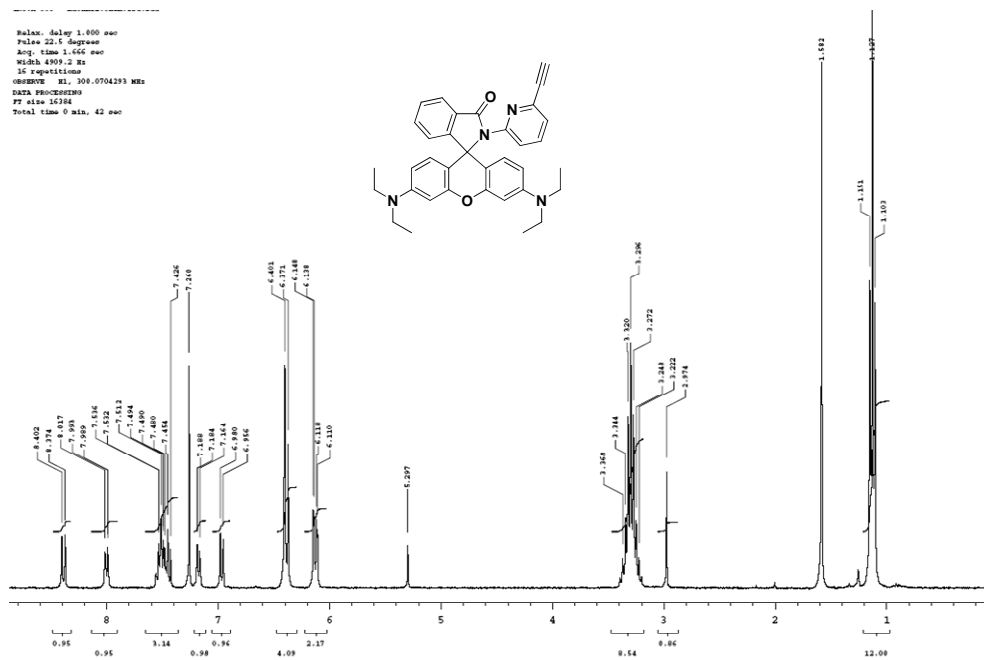

<sup>13</sup>C NMR (125 MHz, CDCl<sub>3</sub>) of compound **7**

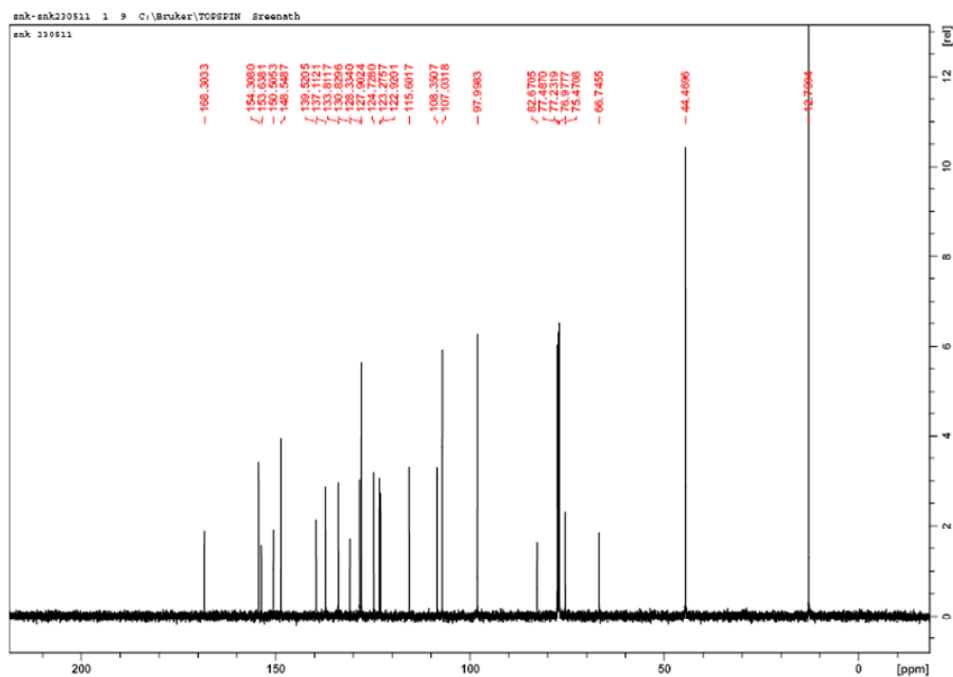

<sup>1</sup>H NMR (300 MHz, CDCl<sub>3</sub>) of compound 2

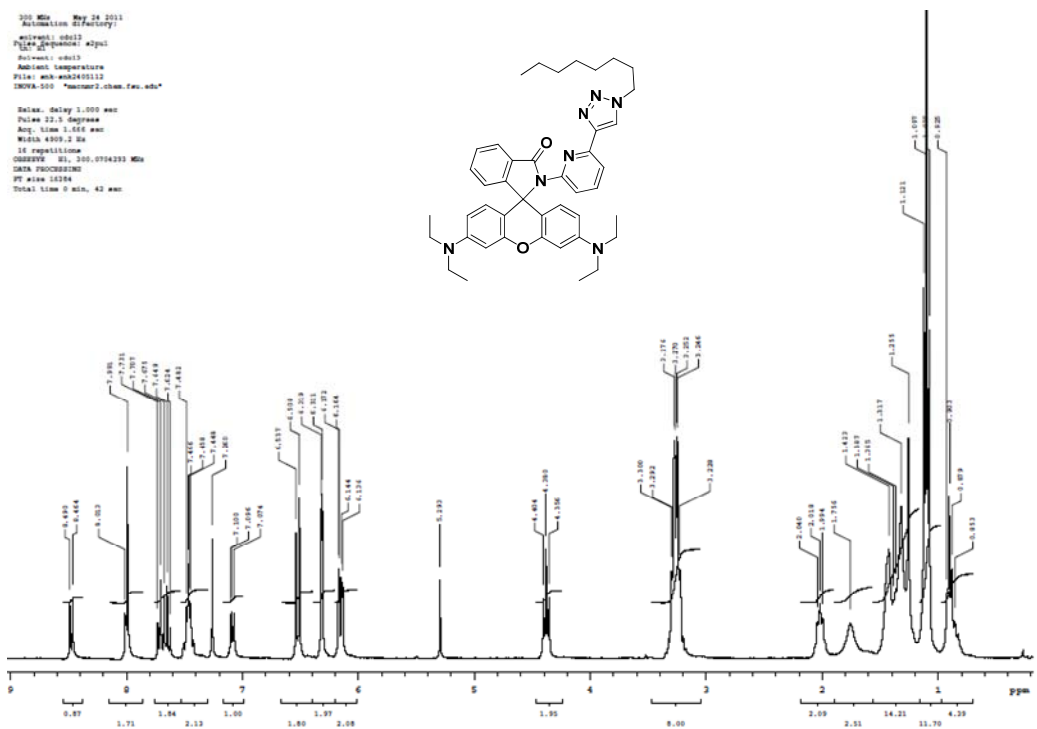

<sup>13</sup>C NMR (125 MHz, CDCl<sub>3</sub>) of compound 2

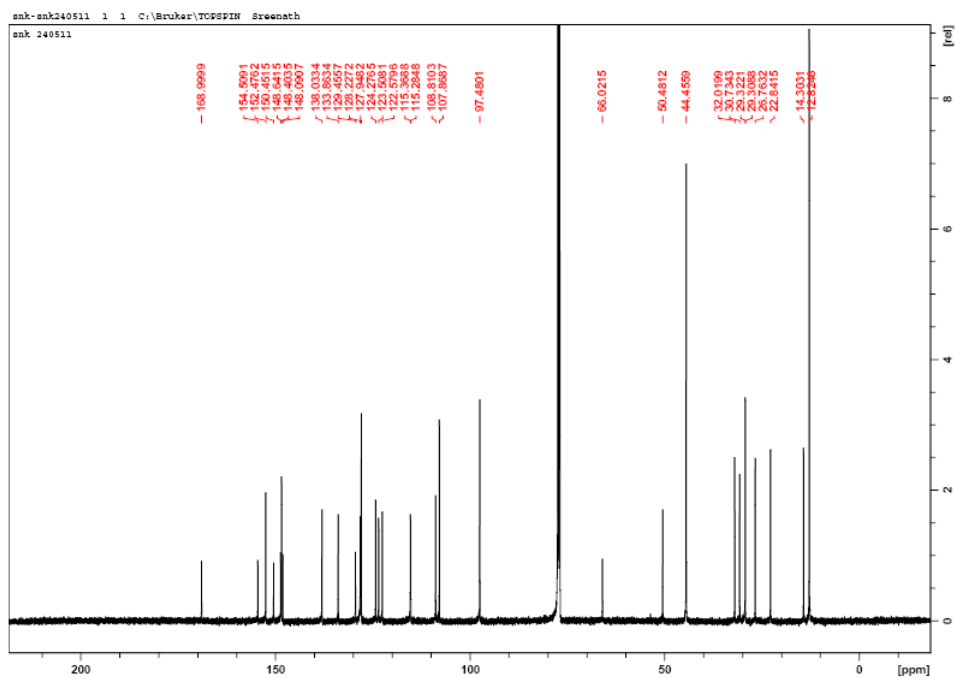







$^1\text{H}$  NMR (300 MHz,  $\text{CDCl}_3$ ) of compound **10**

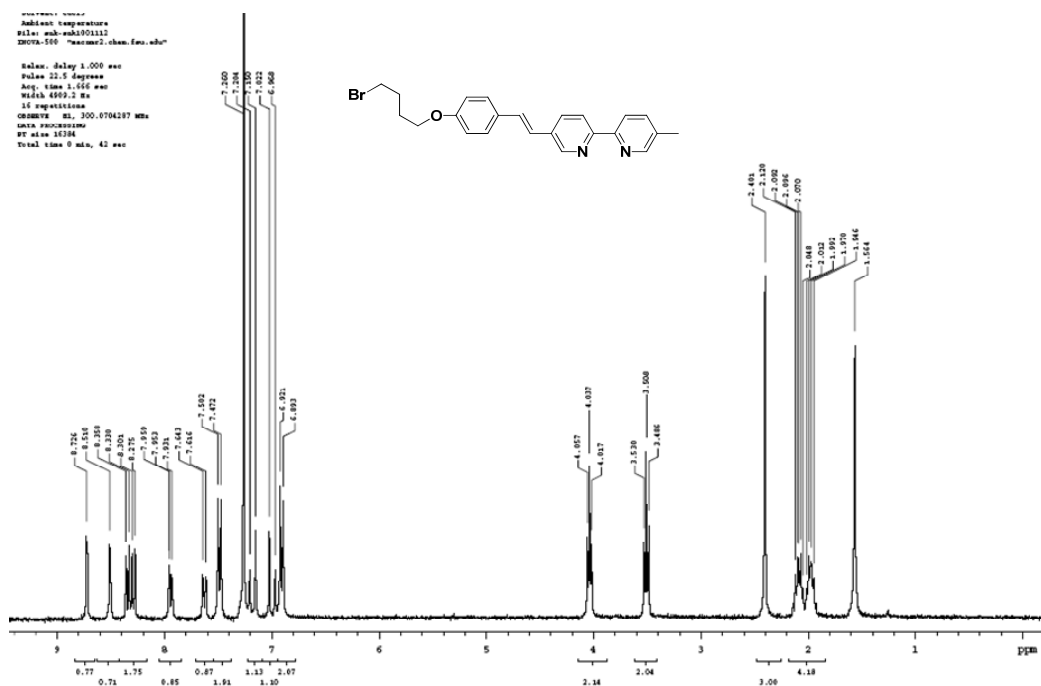

$^{13}\text{C}$  NMR (125 MHz,  $\text{CDCl}_3$ ) of compound **10**

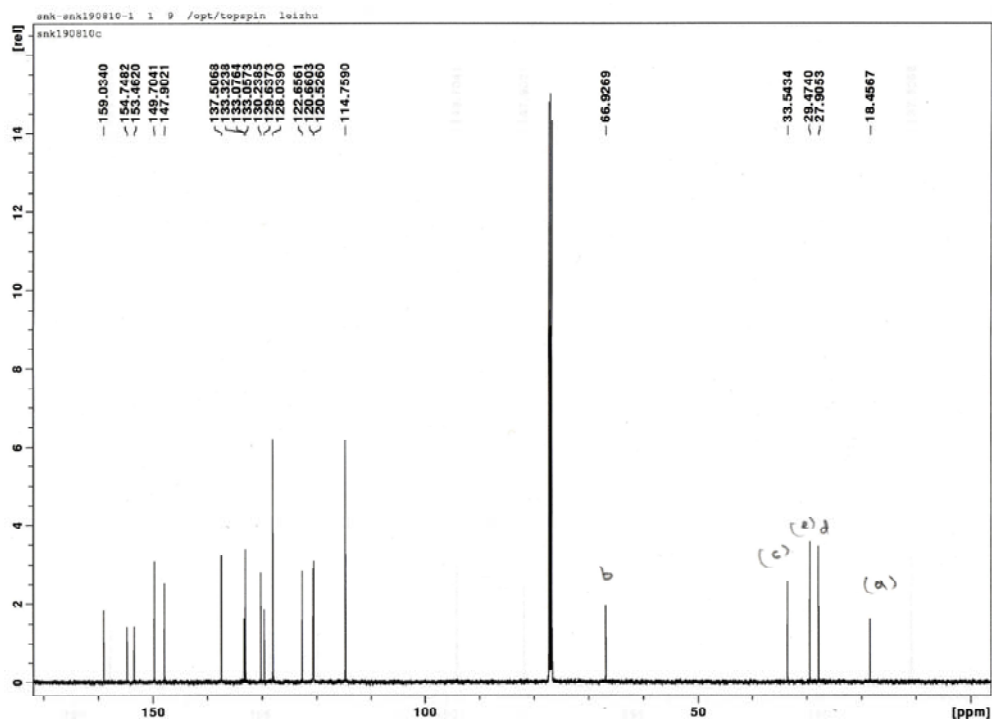

$^1\text{H}$  NMR (300 MHz,  $\text{CDCl}_3$ ) of compound **11**

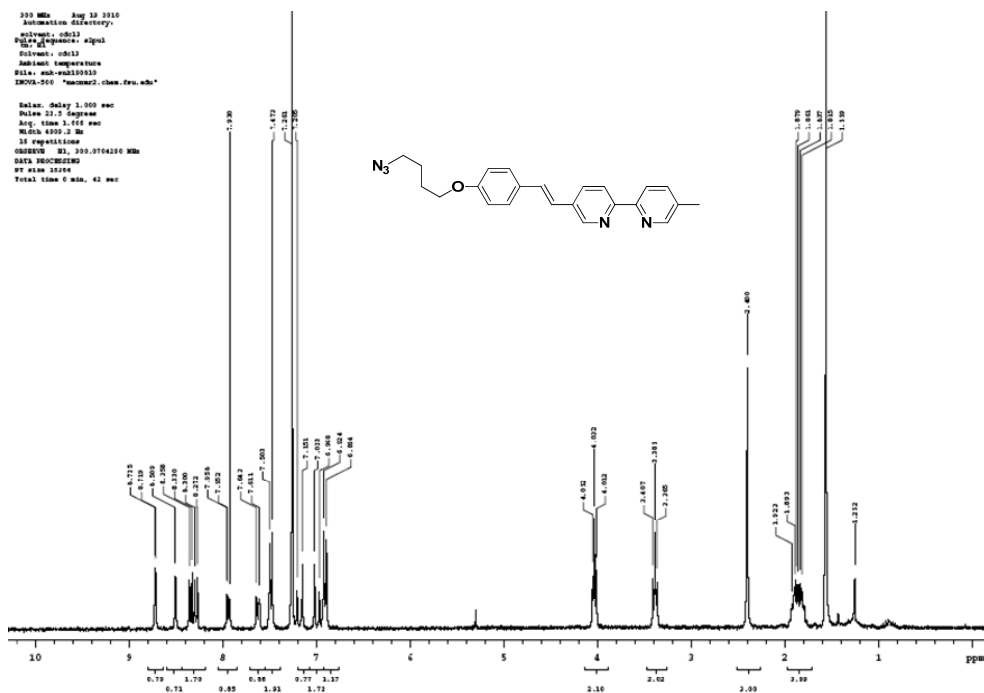

$^{13}\text{C}$  NMR (125 MHz,  $\text{CDCl}_3$ ) of compound **11**

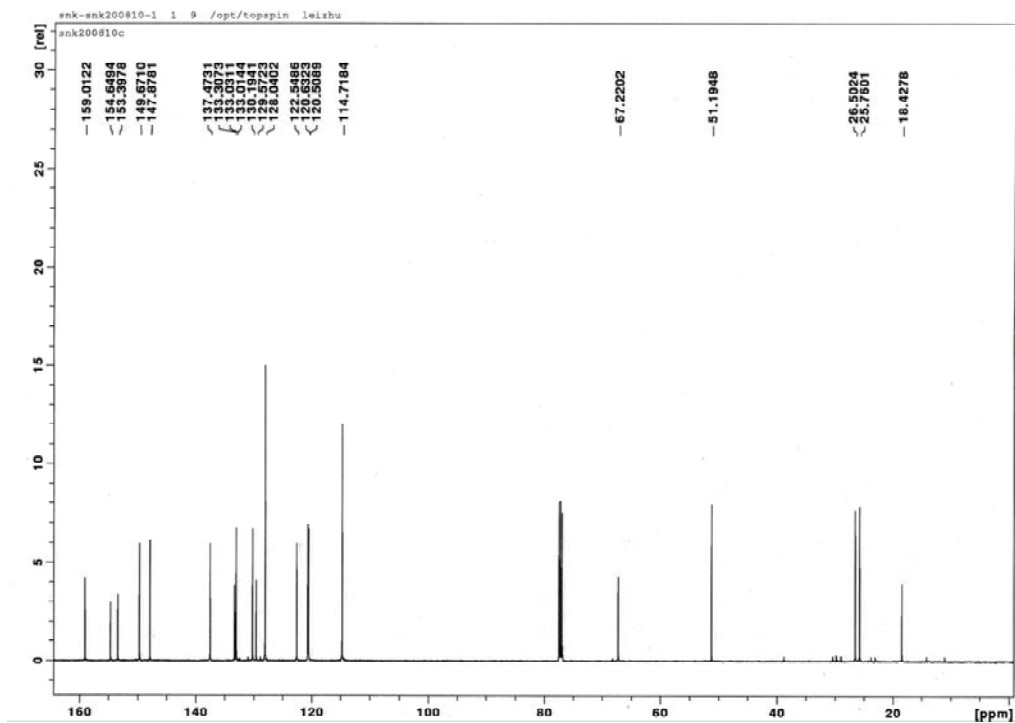

<sup>1</sup>H NMR (300 MHz, CDCl<sub>3</sub>) of compound 4

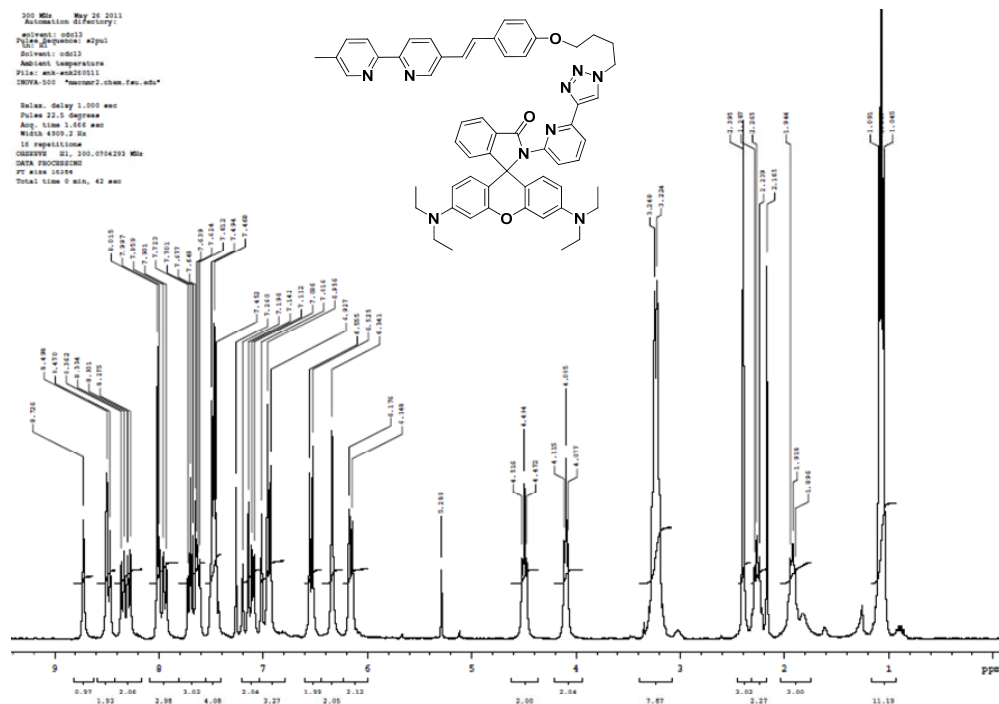

<sup>13</sup>C NMR (125 MHz, CDCl<sub>3</sub>) of compound 4

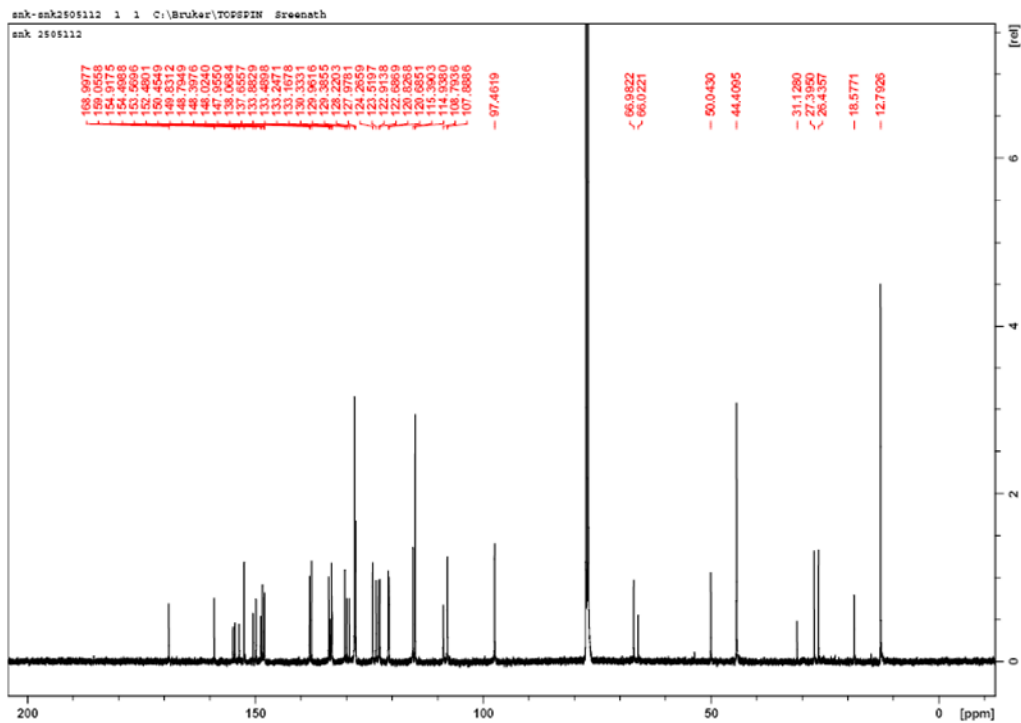



<sup>1</sup>H NMR (300 MHz, CDCl<sub>3</sub>) of compound **5**

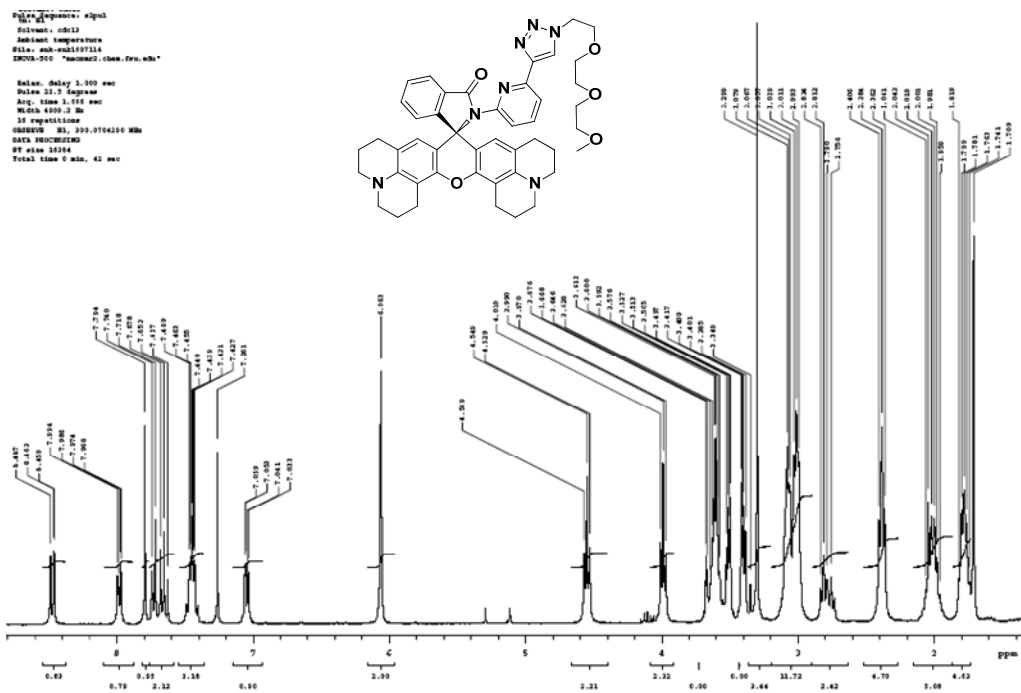

<sup>13</sup>C NMR (125 MHz, CDCl<sub>3</sub>) of compound **5**

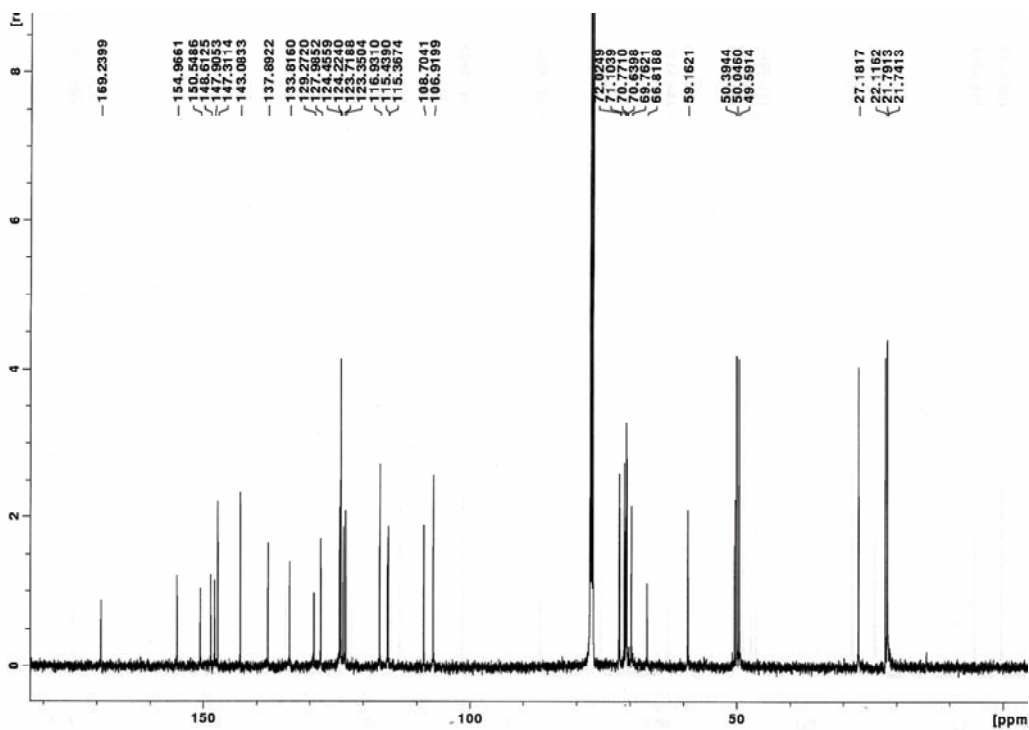

<sup>1</sup>H NMR (300 MHz, CDCl<sub>3</sub>) of compound 6

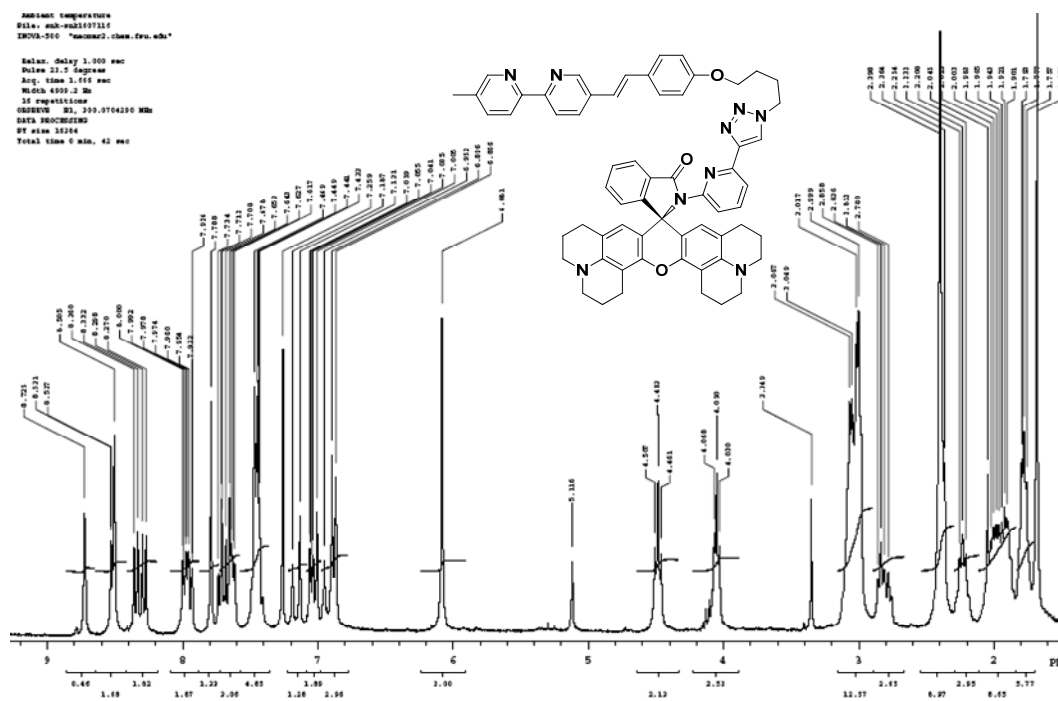

<sup>13</sup>C NMR (125 MHz, CDCl<sub>3</sub>) of compound 6

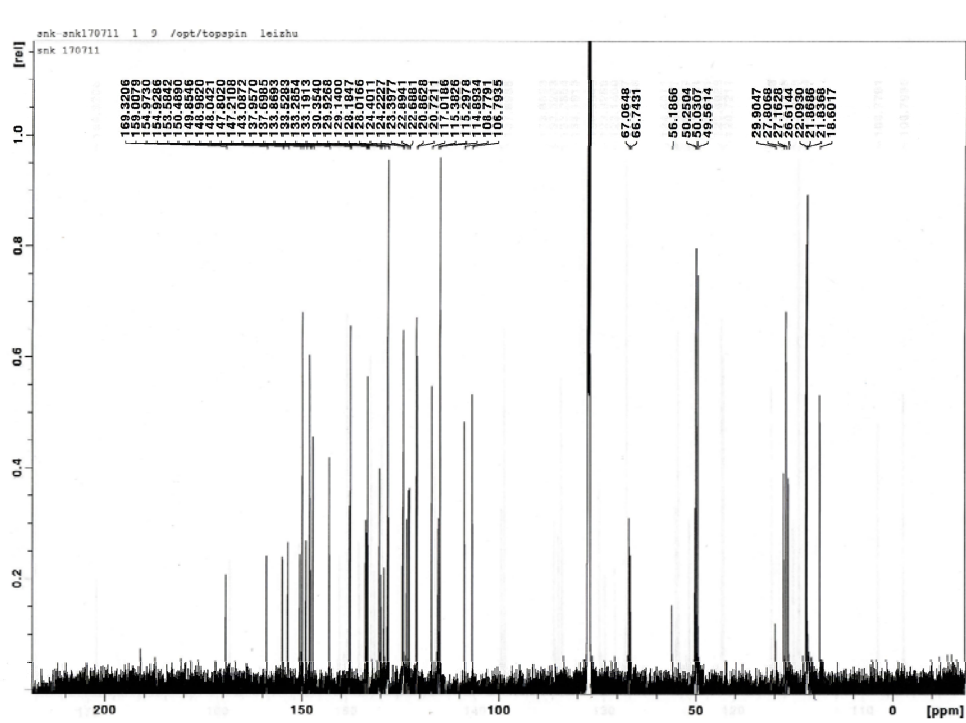

Supplement: NIHMS404164-supplement-1_si_001.pdf [file NIHMS404164-supplement-1_si_001.pdf]
